# Supplementary material for: Hodological organization of spoken language production and singing in the human brain
Source: PubMed Central journal article supplement (PMC10371982; doi:10.1038/s42003-023-05152-y), 2023-07-26
Supplement: 42003_2023_5152_MOESM1_ESM.pdf [file 42003_2023_5152_MOESM1_ESM.pdf]

**Supplementary information**  
**for**  
**Hodological organization of spoken language production and**  
**singing in the human brain**

Anni Pitkäniemi, Teppo Särkämö, Sini-Tuuli Siponkoski, Sonia L.E. Brownsett,  
David A. Copland, Viljami Sairanen, and Alekski J. Sihvonen

***Contents***

**Supplementary Figure 1.** Secondary analyses of connected spoken language production and singing efficacy controlling for additional confounding factors

**Supplementary Figure 2.** White matter connectome negatively associated with connected singing efficacy in more severe spoken language deficits group

**Supplementary Figure 3.** Registration result of the orientation distribution function to MNI space for each patient (N = 45)

**Supplementary Figure 4.** Lesion overlap map for all participants (N = 45)

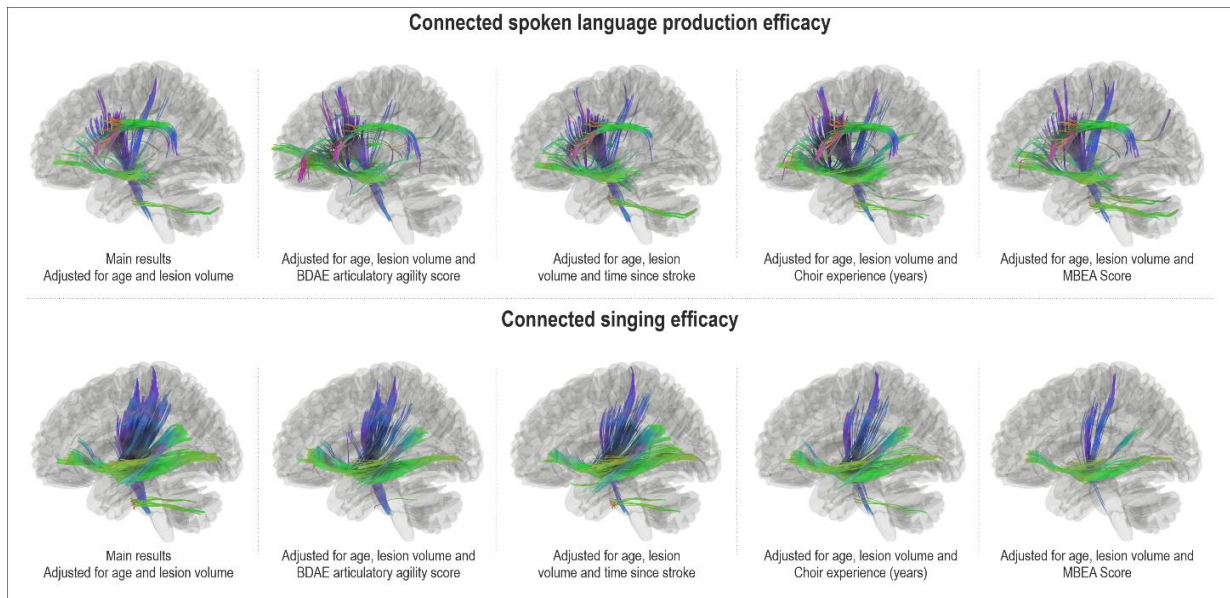

**Supplementary Figure 1. Secondary analyses of connected spoken language production and singing efficacy controlling for additional confounding factors.** Main results controlled for additional confounding factors (alongside age and lesion volume). For all analyses, T-score threshold = 3, voxel length threshold = 30 and false discovery rate (FDR) = 0.0083.

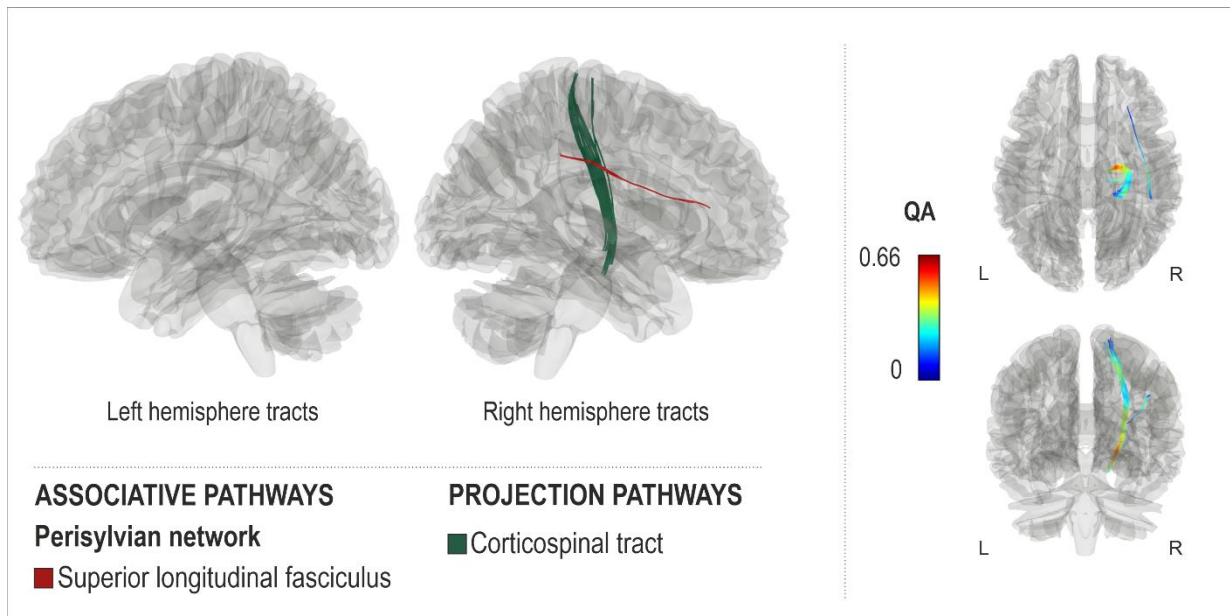

**Supplementary Figure 2. White matter connectome negatively associated with connected singing efficacy in more severe spoken language deficits group.** In the more severe spoken language deficits group ( $n = 21$ ), poorer connected singing efficacy was associated with greater QA in the right dorsal stream (superior longitudinal fasciculus) and right projection pathways (corticospinal tract) ( $FDR < 0.0083$ ). L = left, R = right.

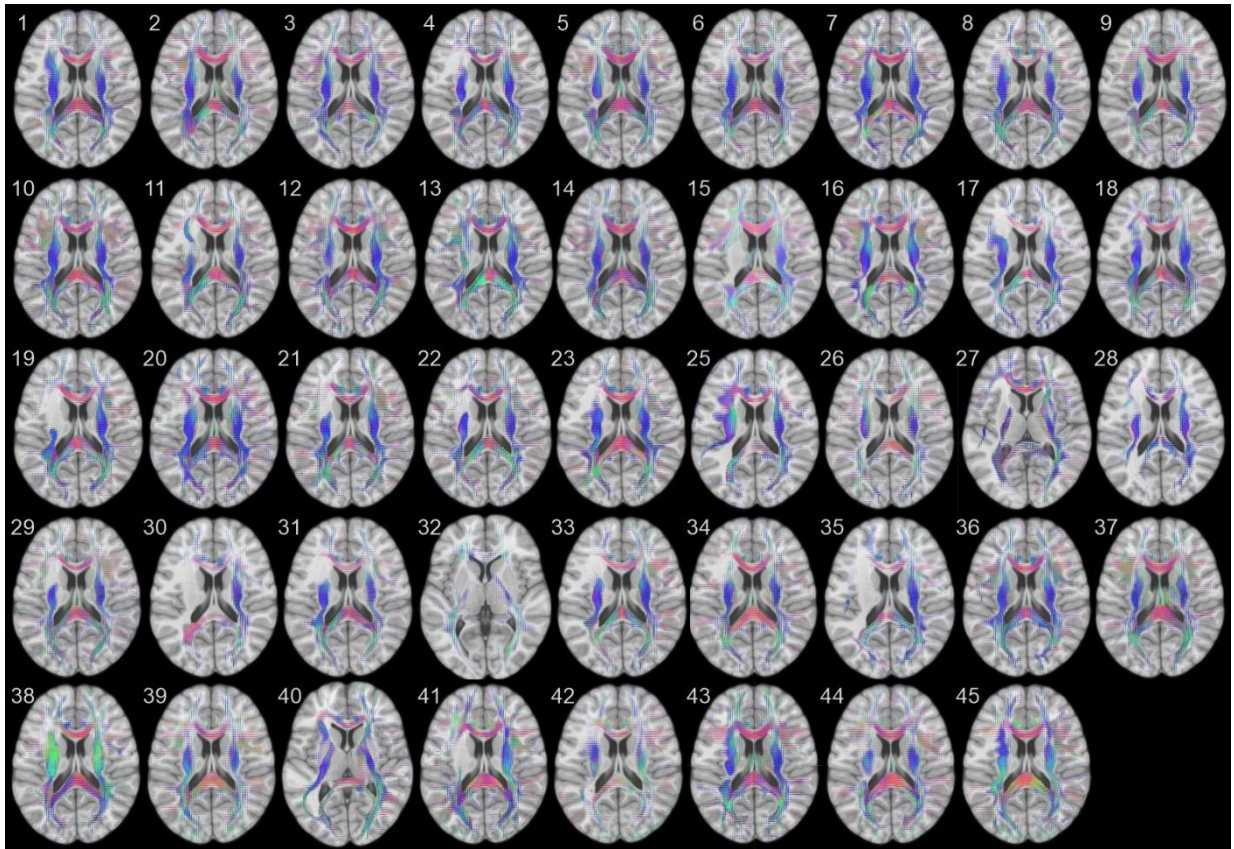

**Supplementary Figure 3. Registration result of the orientation distribution function to MNI space for each patient (N = 45).**

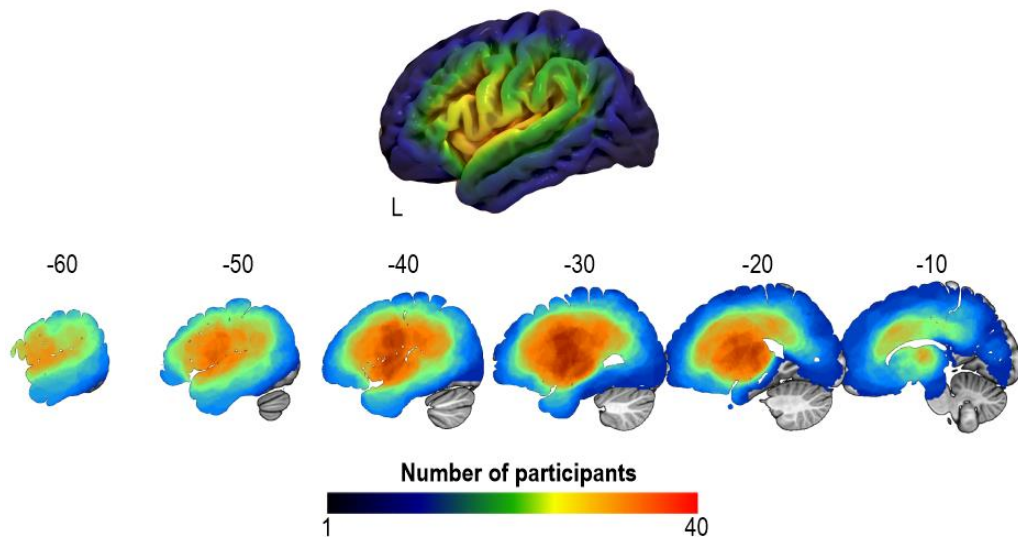

**Supplementary Figure 4. Lesion overlap map for all participants (N = 45).** The warmer the areas, the greater the lesion overlap. Accordingly, the color scale ranges from 1 to 40 overlapping participants. Left hemisphere is shown with MNI coordinates at the top of each slice.
